# Supplementary material for: AMBRA1 Negatively Regulates the Function of ALDH1B1, a Cancer Stem Cell Marker, by Controlling Its Ubiquitination
Source: MDPI journal article supplement (doi:10.3390/ijms222112079), 2021-11-08
Supplement: s1 [file s1]

# AMBRA1 negatively regulates the function of ALDH1B1, a Cancer Stem Cell Marker, by Controlling its Ubiquitination

Seung-Heon Baek <sup>1,2</sup>, Yeun-Kyu Jang <sup>1,2,\*</sup>

<sup>1</sup> Department of Systems Biology, College of Life Science and Biotechnology, Yonsei University, Seoul 03722, Republic of Korea; [baeksh9505@naver.com](mailto:baeksh9505@naver.com)  
<sup>2</sup> BK21 Yonsei Education & Research Center for Biosystems, Yonsei University, Seoul 03722, Republic of Korea.  
\* Correspondence: [ykjang@yonsei.ac.kr](mailto:ykjang@yonsei.ac.kr), Tel: 82-2-2123-5654, Fax: 82-2-312-5657

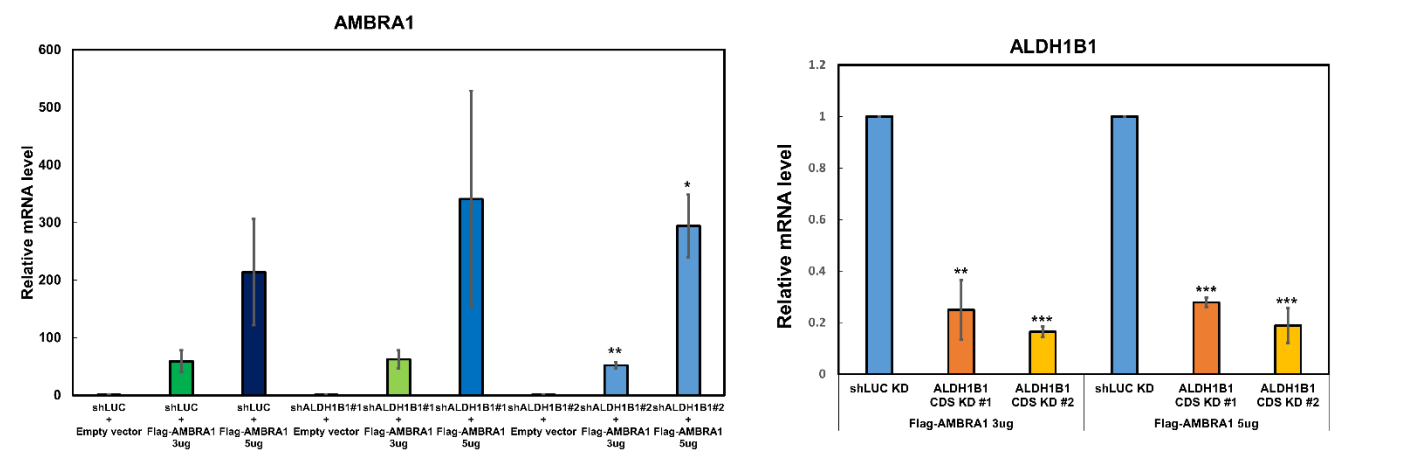

**Supplementary Figure S1.** Efficiencies of AMBRA1 overexpression and *ALDH1B1* knockdown were confirmed by RT-qPCR (corresponds to Figure 3) (*n* = 3).

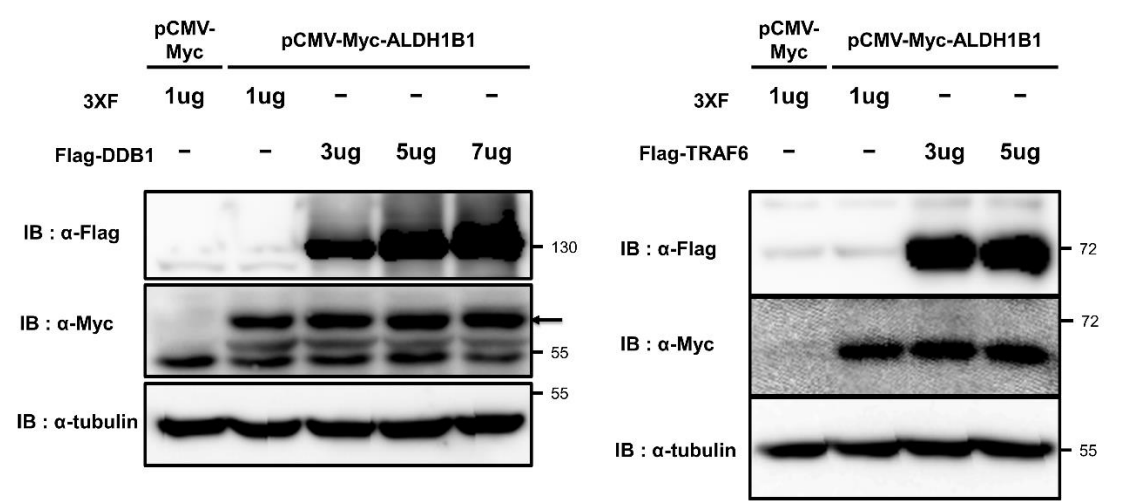

**Supplementary Figure S2.** Protein level of Myc-ALDH1B1 after overexpressing Flag-DDB1 and Flag-TRAF6. Indicated amounts of Flag-DDB1 or Flag-TRAF6 were transfected into pCMV-Myc-ALDH1B1 HCT116 cells and the protein level of Myc-ALDH1B1 was investigated by western blot analysis. α-Tubulin was detected as a loading control (*n* = 3).

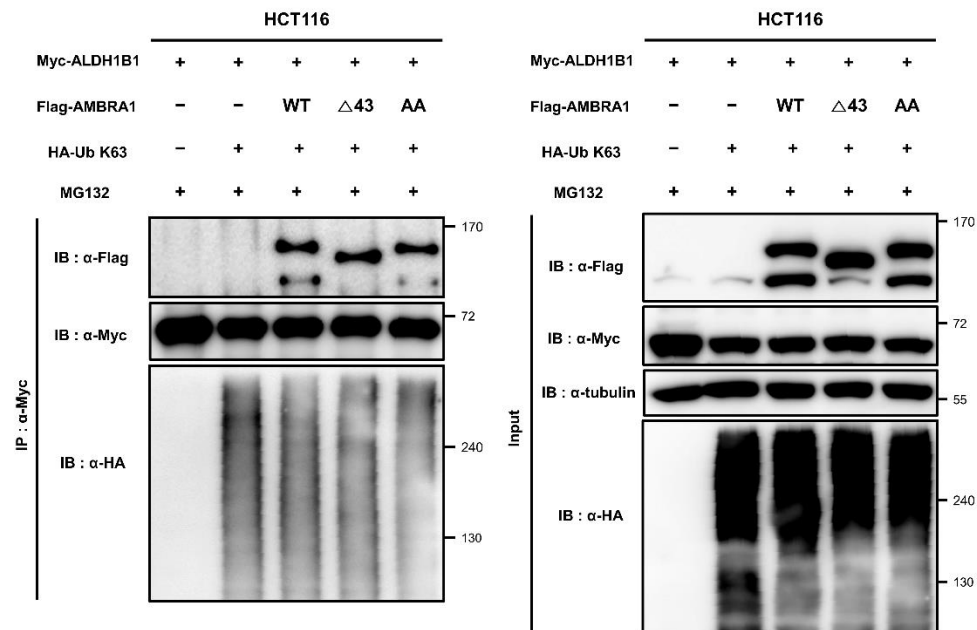

**Supplementary Figure S3.** K63-mediated ubiquitination of Myc-ALDH1B1 as investigated by co-immunoprecipitation. Myc-ALDH1B1 and Flag-AMBRA1 WT,  $\Delta 43$ , AA were cotransfected with HA-Ub K63 into HCT116 cells, which were treated with 10  $\mu$ M MG-132 for 6 h. K63-linked ubiquitination of Myc-ALDH1B1 was detected by immunoprecipitation with anti-c-Myc agarose affinity gel antibody ( $n = 3$ ).

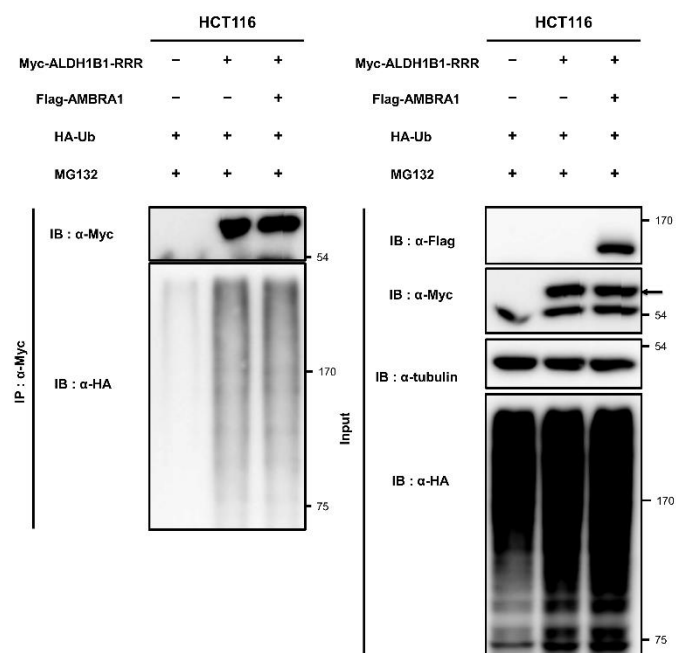

**Supplementary Figure S4.** The ubiquitination of Myc-ALDH1B1-RRR (Myc-ALDH1B1 K506R, K511R, K515R) was analyzed after ectopic expression of AMBRA1. As shown in Fig. 4A, we observed an increase in the ubiquitination of wild-type Myc-ALDH1B1 by AMBRA1. In contrast, immunoprecipitation and immunoblot analysis confirmed that

potential K27- and K33-linked ubiquitination-defective ALDH1B1 interacted with a similar amount of HA-Ub before and after AMBRA1 overexpression ( $n = 3$ ).

**Supplementary Table S1. Primer sequences used for cloning**

| Gene    | Primer sequence (5' to 3')                                                | Accession no.  |
|---------|---------------------------------------------------------------------------|----------------|
| AMBRA1  | F : GCGGATATCATGAAGGTTGTCCCAGAA<br>R : GCGATCGATCTACCTGTTCCGTGGTTC        | NM_001367471.1 |
| ALDH1B1 | F : ATAGATATCATGCTGCGCTTCCTGGCA<br>R : GCGGTCGACTTACGAGTTCTTCTGAGG        | NM_000692.5    |
| DDB1    | F : ATAGATATCATGTCGTACAACCTACGTGGTA<br>R : ATAGTCGACCTAATGGATCCGAGTTAGCTC | NM_001923.5    |
| TRAF6   | F : GCGAAGCTTATGAGTCTGCTAAACTGT<br>R : ATAGTCGACCTATACCCCTGCATCAGT        | NM_145803.3    |

**Supplementary Table S2. Primer sequences used for mutagenesis**

| <b>Mutation</b>                     | <b>Primer sequence (5' to 3')</b>                                               | <b>Type of mutation</b> |
|-------------------------------------|---------------------------------------------------------------------------------|-------------------------|
| <b>AMBRA1 <math>\Delta</math>43</b> | F : GCGGATATCATGGGCAAGAGAGTAGAACTG<br>R : GCGATCGATCTACCTGTTCCGTGGTTC           | <b>Deletion</b>         |
| <b>AMBRA1 E620A</b>                 | F : AGTTGCCACCTCTCGCGCGGACTGAGGGCCA<br>R : TGGCCCTCAGTCCGCGCGAGAGGTGGCAACT      | <b>Point mutation</b>   |
| <b>AMBRA1 E683A</b>                 | F : AGGATATGCCTGAGGCGAGCTCTGAGGAGGA<br>R : TCCTCCTCAGAGC31merTCGCCTCAGGCATATCCT | <b>Point mutation</b>   |

**Supplementary Table S3. Primer sequences used for small hairpin RNA(shRNA)-based knockdown system**

| Gene    | Primer sequence (5' to 3')                                                                                                                       | Target region                   | Accession no.  |
|---------|--------------------------------------------------------------------------------------------------------------------------------------------------|---------------------------------|----------------|
| AMBRA1  | F : CCGG GTCCACGCTCTACCTTCTTAT CTCGAG<br>ATAAGAAGGTAGAGCGTGGAC TTTTGT<br>R : AATTCAAAAA GTCCACGCTCTACCTTCTTAT<br>CTCGAG ATAAGAAGGTAGAGCGTGGAC    | CDS (coding sequence)           | NM_001367471.1 |
|         | F : CCGG GCATGTGGACTCTTAACTGTA CTCGAG<br>TACAGTTAAGAGTCCACATGC TTTTGT<br>R: AATTCAAAAA GCATGTGGACTCTTAACTGTA<br>CTCGAG TACAGTTAAGAGTCCACATGC     | 3'-UTR (3' Untranslated Region) |                |
| ALDH1B1 | F : CCGG GAATCCATCTACAATGAGTTT CTCGAG<br>AAACTCATTGTAGATGGATTC TTTTGT<br>R : AATTCAAAAA GAATCCATCTACAATGAGTTT<br>CTCGAG AAACTCATTGTAGATGGATTC    | CDS                             | NM_000692.5    |
|         | F : CCGG TCGAGAGAACCGTGGAGAAAG<br>CTCGAG CTTTCTCCACGGTTCTCTCGA TTTTGT<br>R : AATTCAAAAA<br>TCGAGAGAACCGTGGAGAAAG CTCGAG<br>CTTTCTCCACGGTTCTCTCGA | CDS                             |                |

Supplementary Table S4. Primer sequences used for real-time PCR

| Gene           | Primer sequence (5' to 3')                                   | Accession no.  |
|----------------|--------------------------------------------------------------|----------------|
| GAPDH          | F : TGATGACATCAAGAAGGTGGTGAAG<br>R : TCCTTGGAGGCCATGTGGGCCAT | NM_001289746.2 |
| $\beta$ -actin | F : GCCCTGAGGCACTCTTCCA<br>R : CCAGGGCAGTGATCTCCTTCT         | NM_001101      |
| AMBRA1         | F : GAAATGGGAGGGCAAGAGA<br>R : TCACATGGGTGGAGGCTAA           | NM_001367471.1 |
| ALDH1B1        | F : AGAGGGCCAACAACACCA<br>R : CCCTCCCGTTTCCAGATT             | NM_000692.5    |
| PTEN           | F : TGTTCACTGGCGGAAGTTG<br>R : TCGTGTGGGTCTGAATTG            | NM_001304718.2 |
| CTNNB1         | F : AGTTGATGGGCTGCCAGAT<br>R : TCAAACCAGGCCAGCTGAT           | NM_001904.4    |
| LGR5           | F : CCTGTCCTTGCCTGTGCT<br>R : CCACCCTGAGCAACATCC             | NM_003667.4    |
| HIF1a          | F : GGCAGCAACGACACAGAA<br>R : TTGAGTGCAGGGTCAGCA             | NM_001530.4    |
| ALDH1A3        | F : TCTCGACAAAGCCCTGAAGT<br>R : GGCCAAAGCGTATTCACCTA         | NM_000693.4    |
| CD24           | F : CCCACGCAGATTTATTCCAG<br>R : ACCACGAAGAGACTGGCTGT         | NM_013230.3    |
| SOX4           | F : AAGTACCGGCCAGGAAG<br>R : CTGCCACCGACCTTGTCT              | NM_003107      |
